# Supplementary material
Source: PubMed Central journal article supplement (PMC10501219)
Supplement: iai.00251-23-s0001.pdf [file iai.00251-23-s0001.pdf]

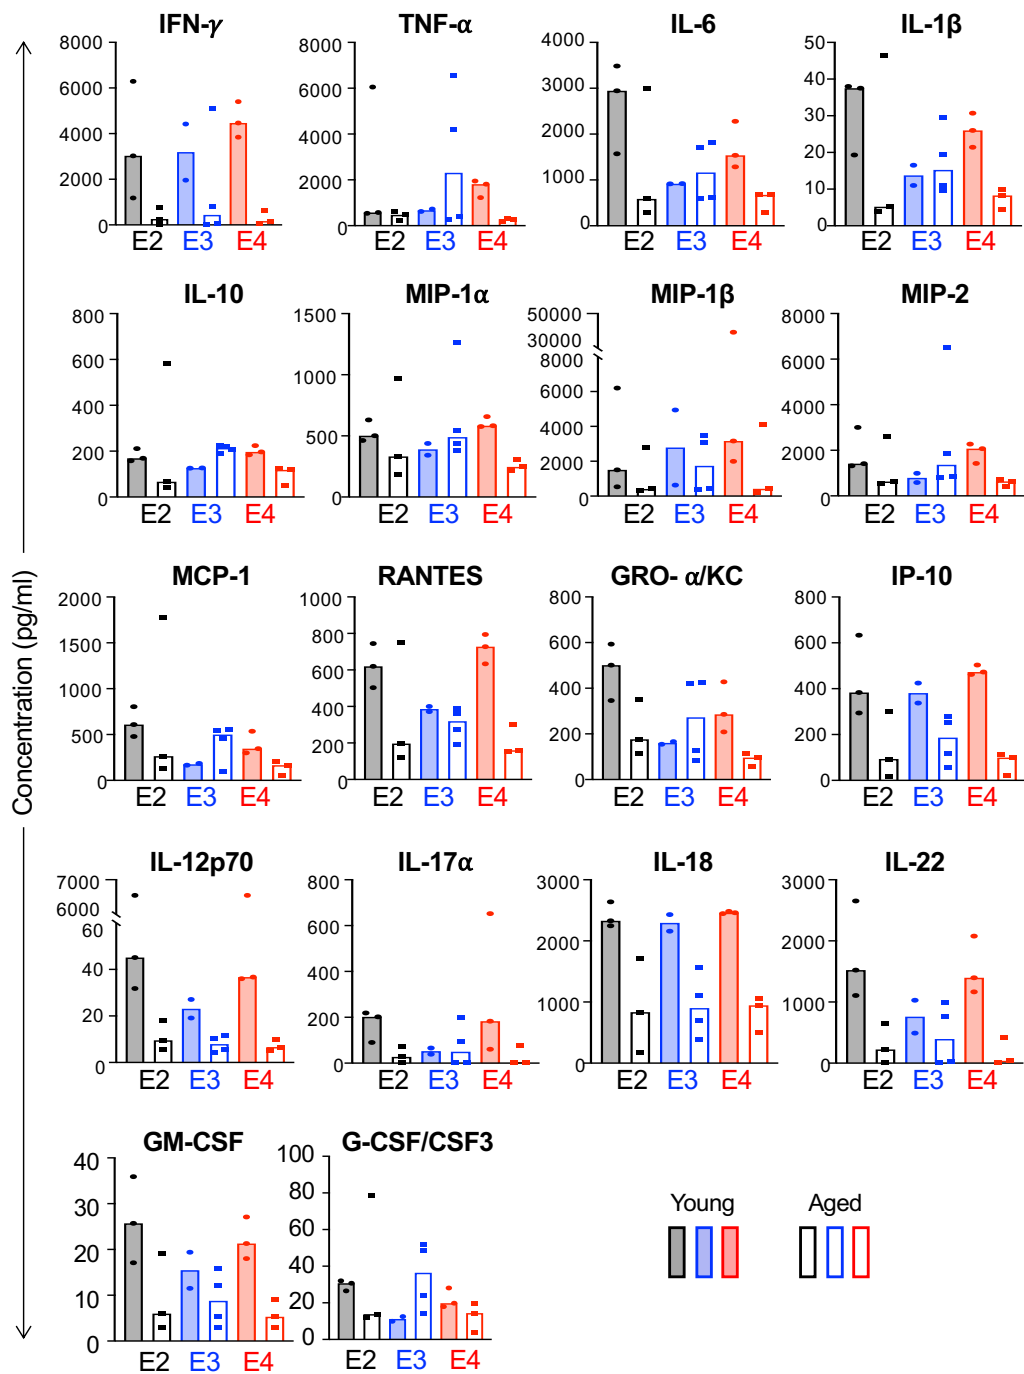

**FIGURE S1.** Additional data to support the results shown in Fig. 7. Splenocytes from young or aged homozygous APOE2/E2 (E2; black), APOE3/E3 (E3; blue), and APOE4/E4 (E4; red) mice were infected with *L. monocytogenes* SD2000 at MOI=1. At 24 h post infection, the supernatants were collected for 36-plex immunoassay. The concentrations of cytokines and chemokines that were upregulated following *L. monocytogenes* infection are presented; the following proteins were either unchanged or undetected: IFN $\alpha$ , IL-1 $\alpha$ , IL-2, IL-3, IL-4, IL-5, IL-9, IL-13, IL-15, IL-23, IL-27, IL-28, IL-31, LIF, M-CSF) and 3 chemokines (eotaxin, CXCL5, MCP-3). Symbols represent data obtained using cells from individual mice; bars indicate median values. Mann-Whitney test was performed to compare the young and aged samples for each mouse strain.
